# Supplementary material for: Cell Sheets from Adipose Tissue MSC Induce Healing of Pressure Ulcer and Prevent Fibrosis via Trigger Effects on Granulation Tissue Growth and Vascularization
Source: MDPI journal article supplement (doi:10.3390/ijms21155567), 2020-08-04

# «UNTREATED» GROUP

Day 14

Day 21

#9

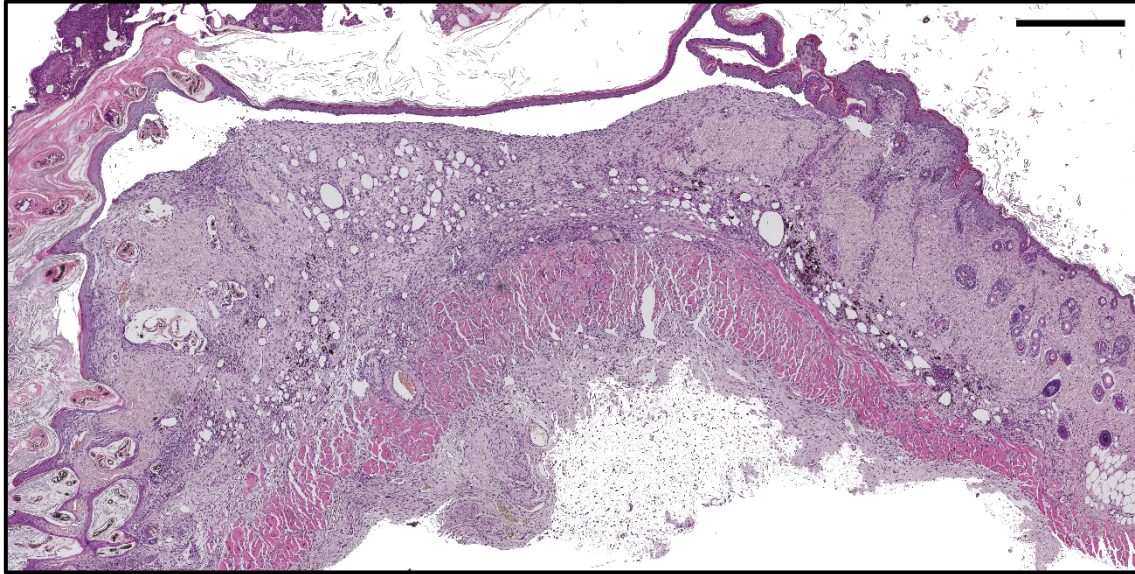

#13

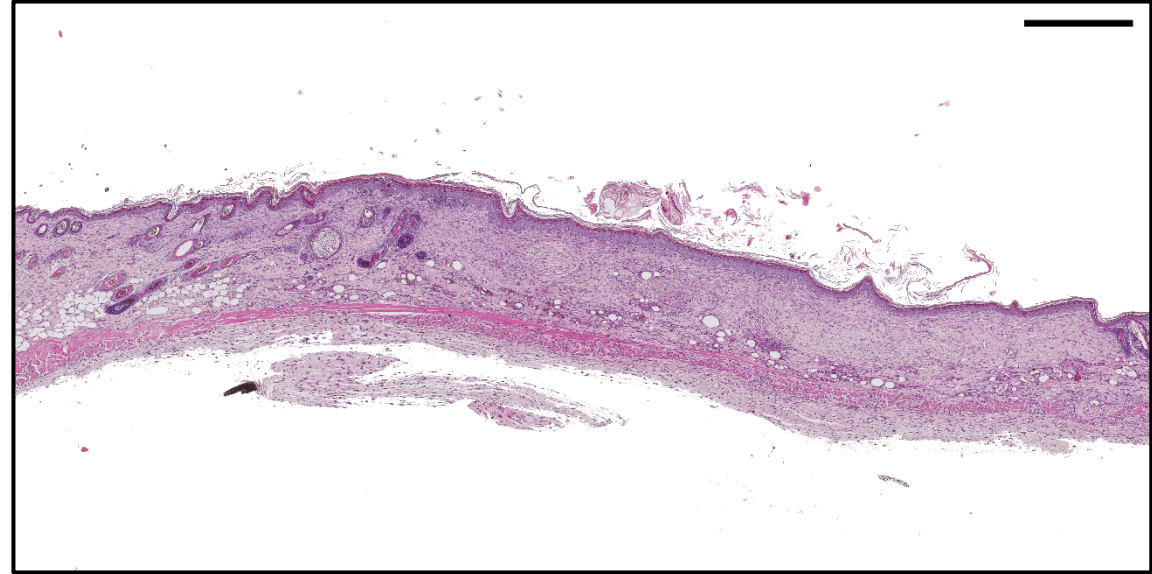

#11

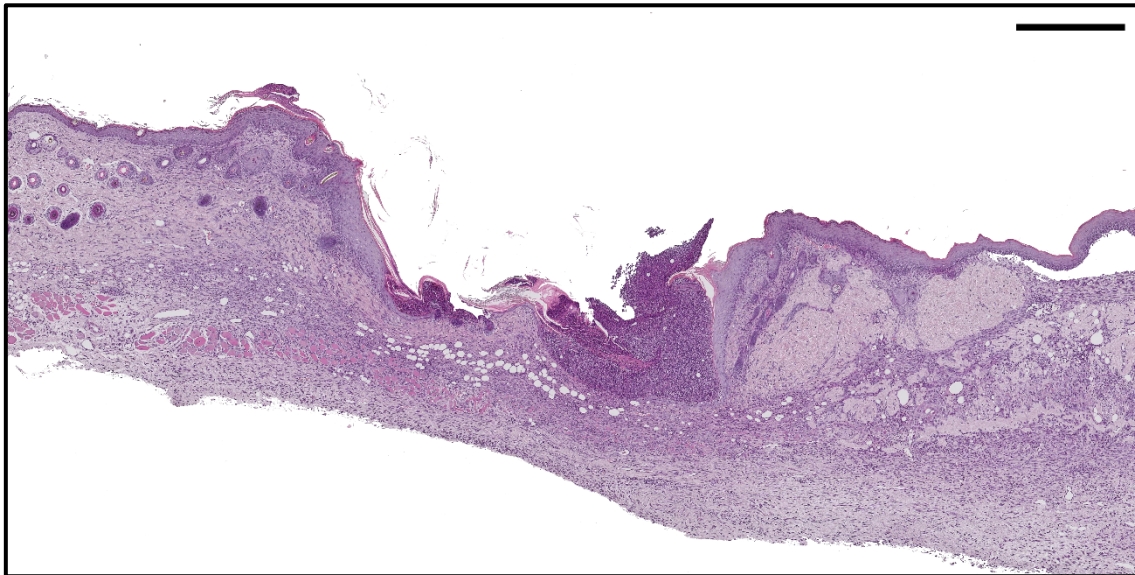

#14

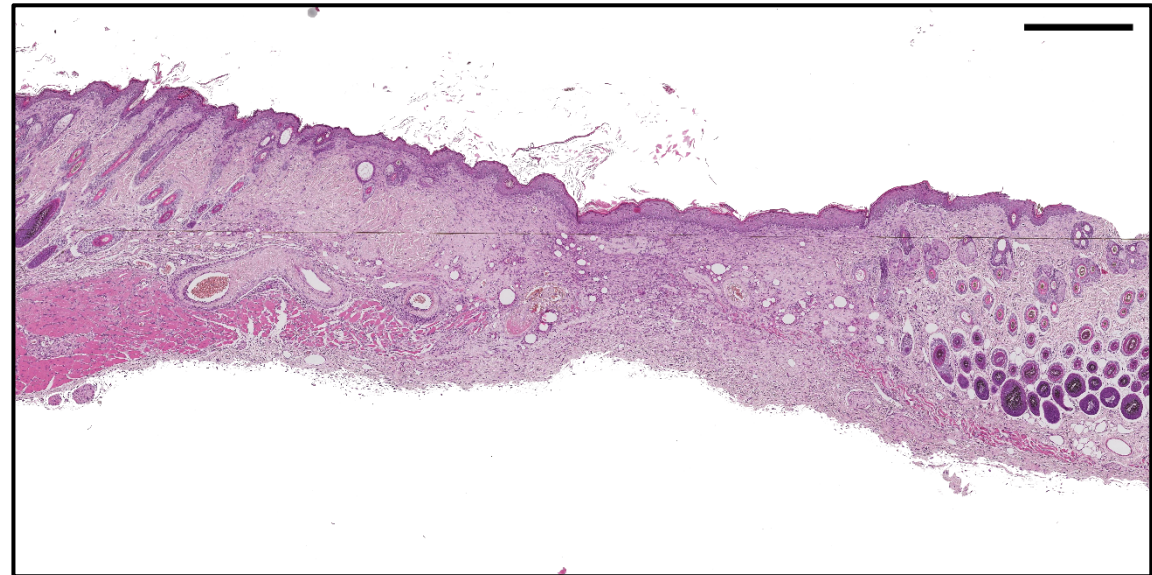



# «SUSPENSION» GROUP

Day 14

Day 21

#23

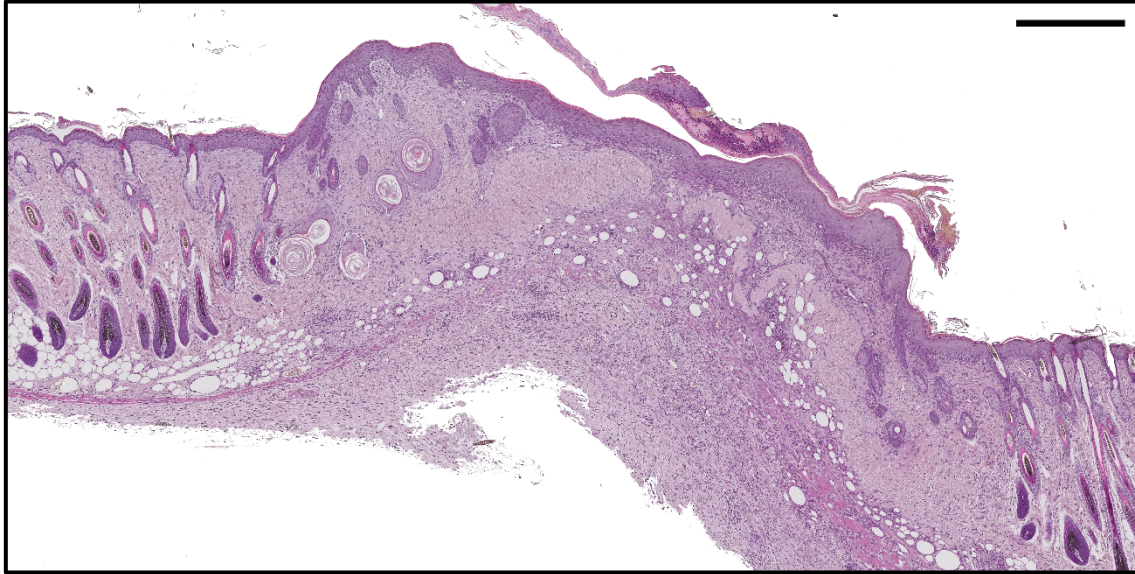

#28

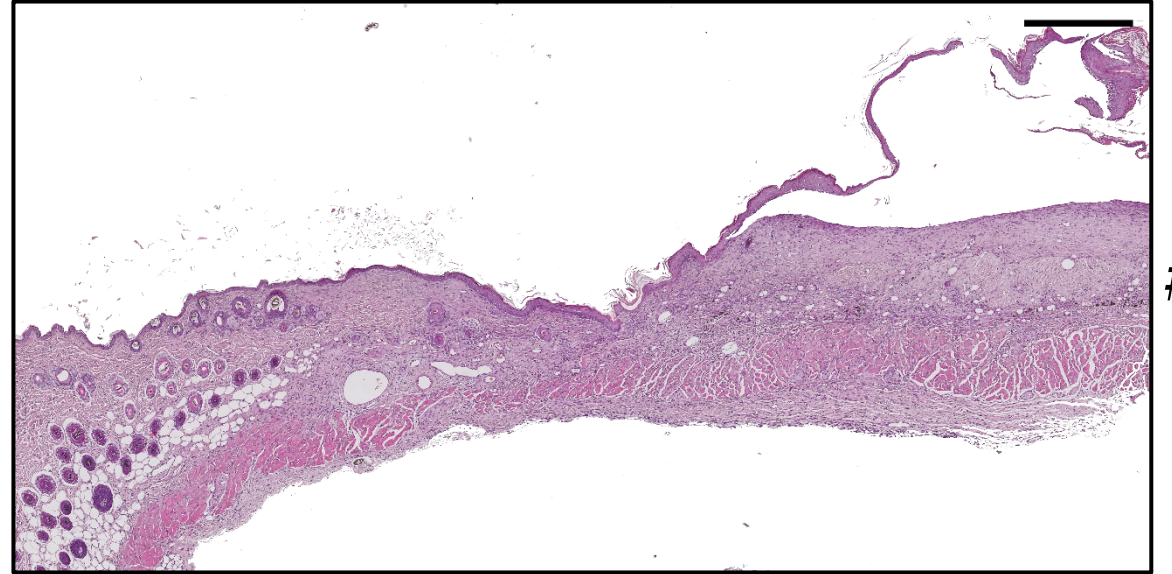

#24

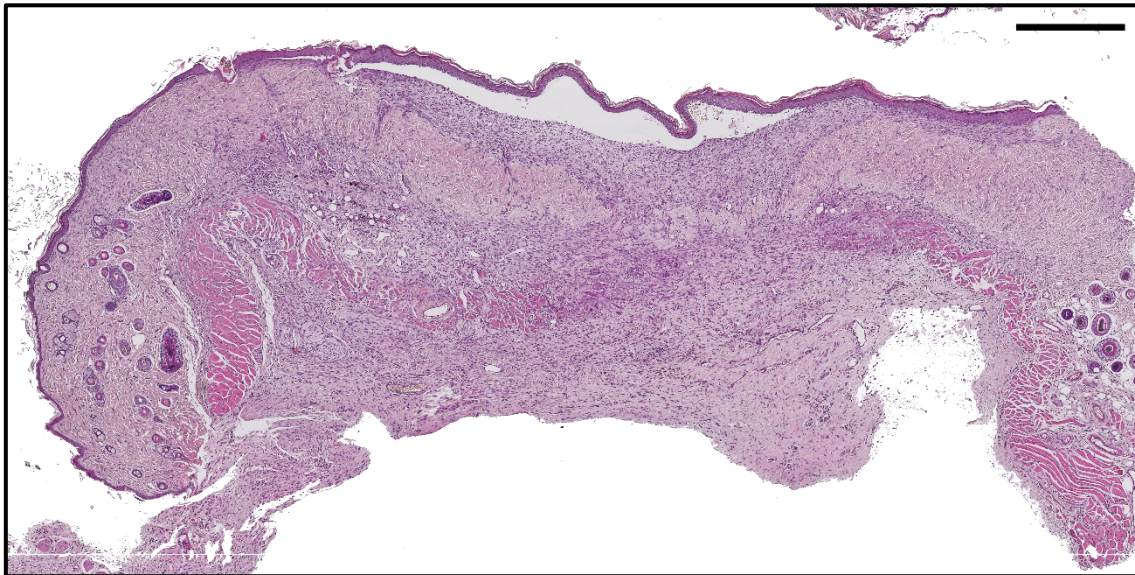

#29

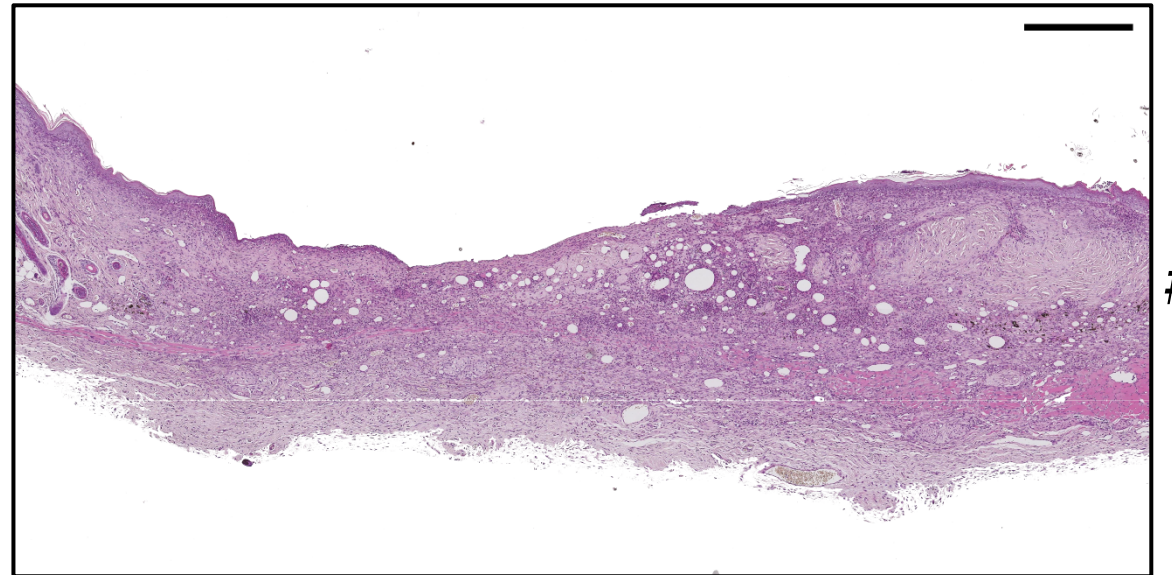



# «SECRETOME» GROUP

Day 14

Day 21

#55

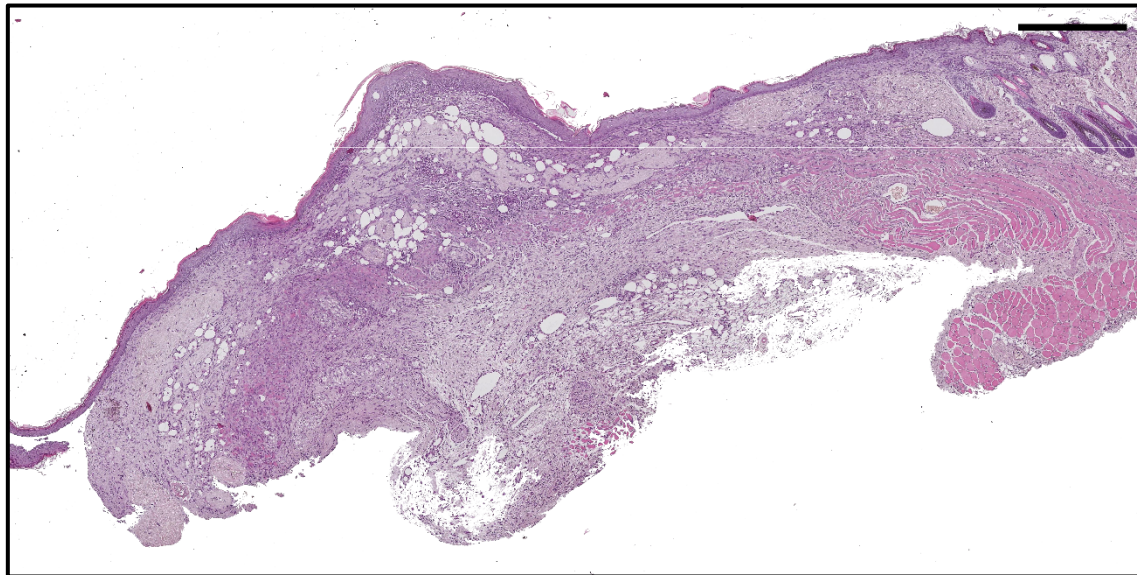

#58

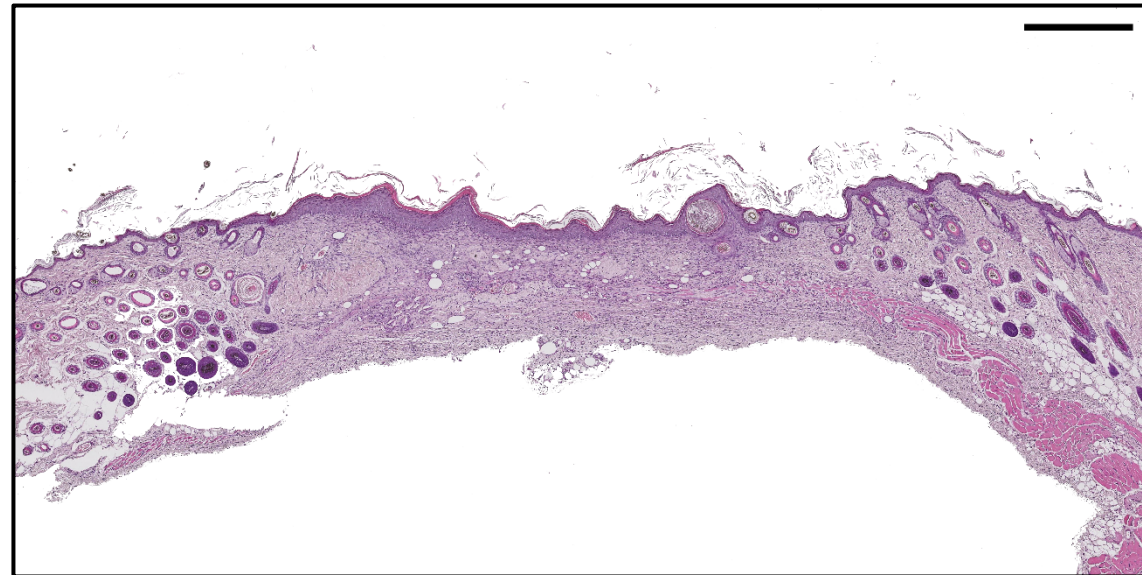

#57

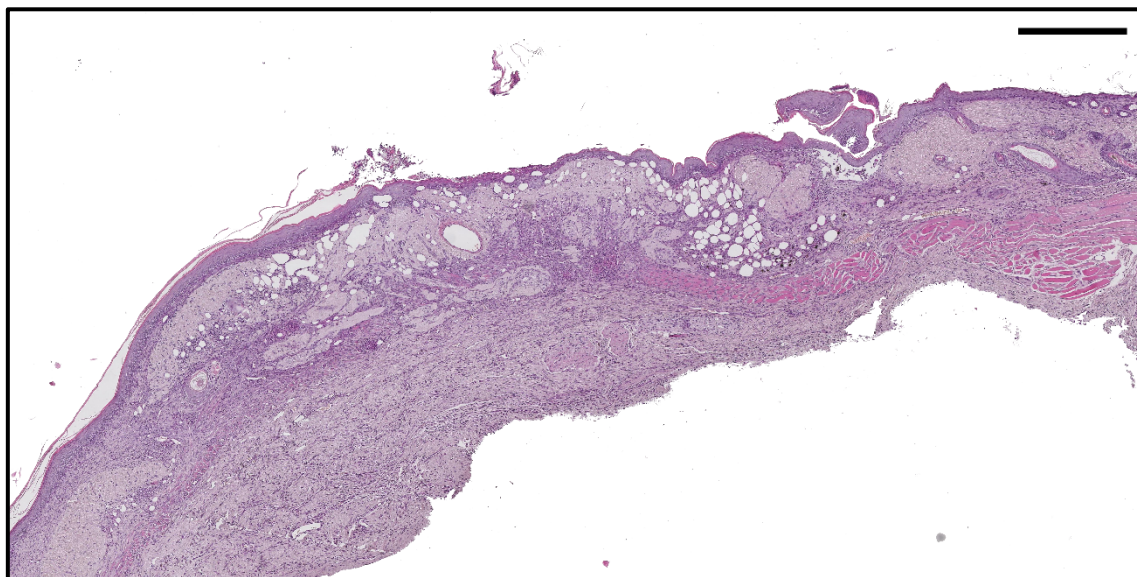

#60

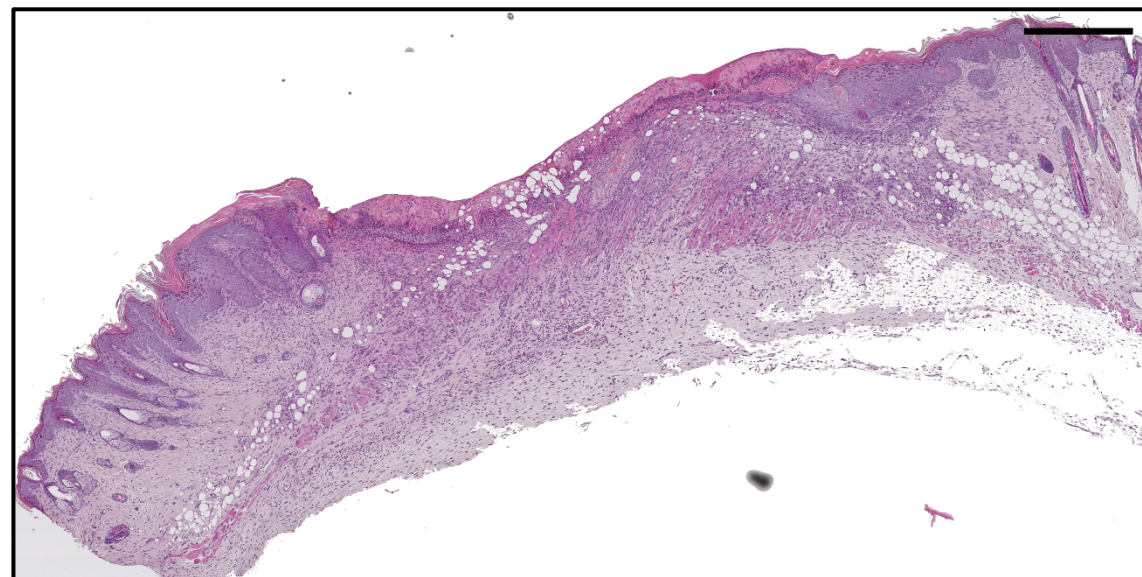



# «CELL SHEET» GROUP

Day 14

Day 21

#43

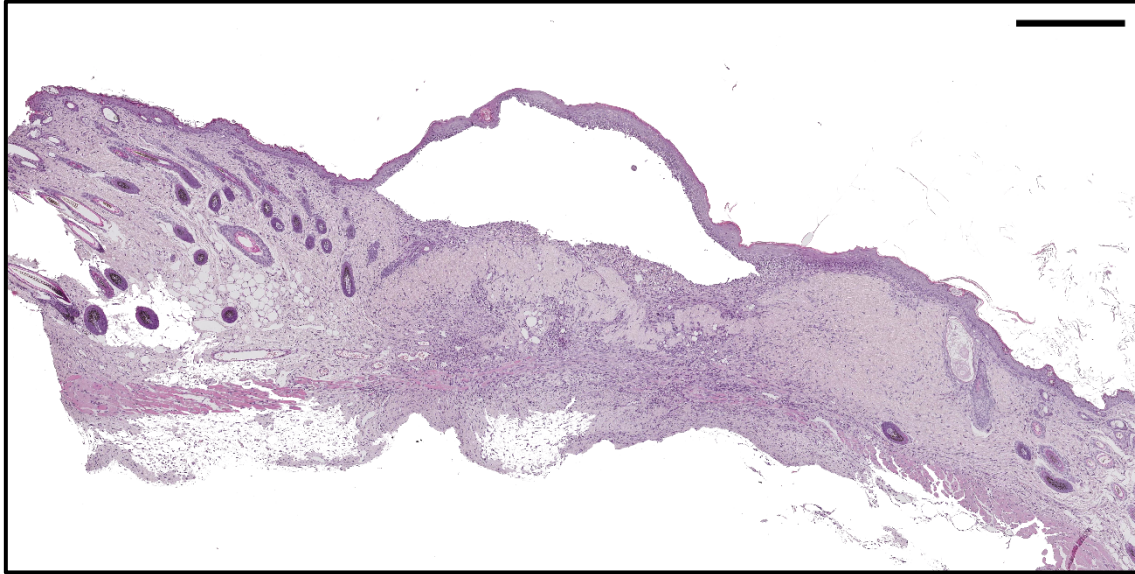

#44

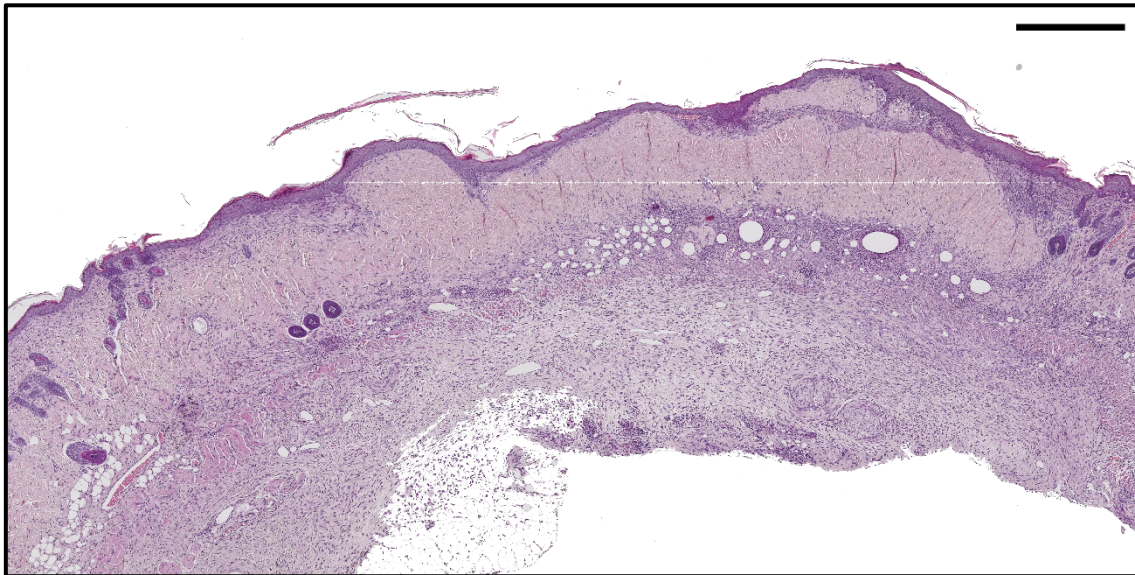

#46

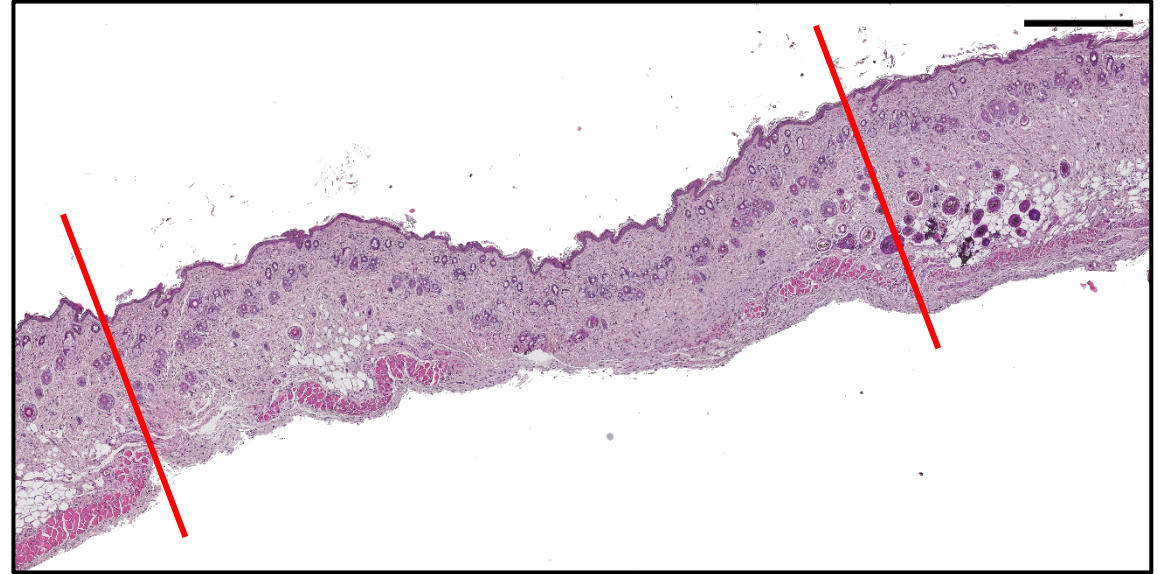

#48

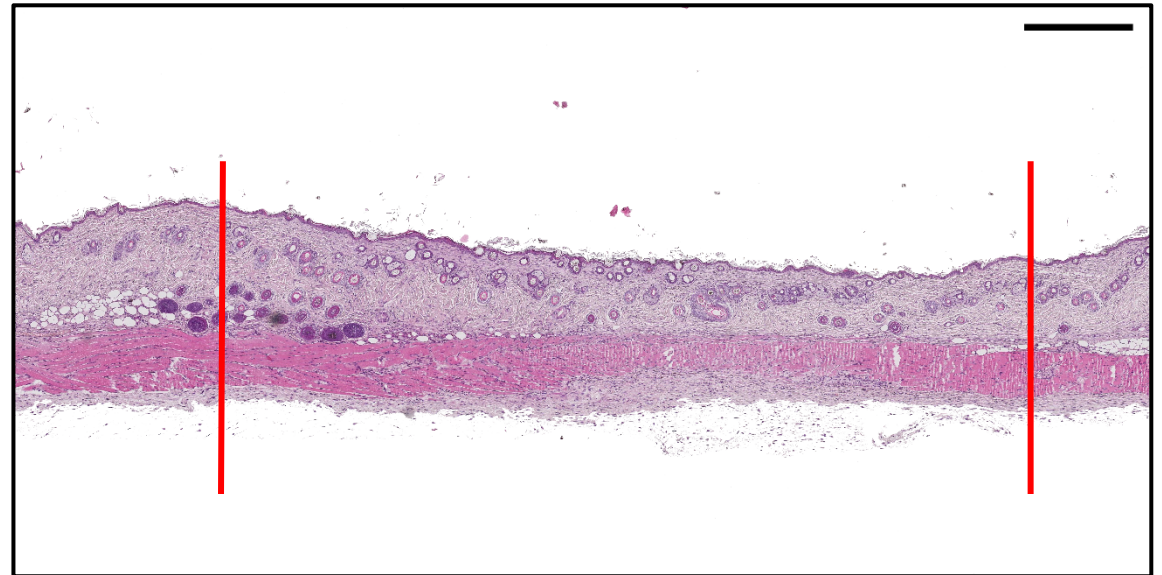

Supplement: s1 [file s1]
