# Supplementary material for: Cell Sheets from Adipose Tissue MSC Induce Healing of Pressure Ulcer and Prevent Fibrosis via Trigger Effects on Granulation Tissue Growth and Vascularization
Source: MDPI journal article supplement (doi:10.3390/ijms21155567), 2020-08-04
Supplement: s1 [file s1]

# Supplementary Table A1

RNA Sequencing/Biological Process

## Upregulated

|    | Term                                                                              | P-value  | Combined Score | Overlap | Genes                                                                                                                                                                                                                                                                      |
|----|-----------------------------------------------------------------------------------|----------|----------------|---------|----------------------------------------------------------------------------------------------------------------------------------------------------------------------------------------------------------------------------------------------------------------------------|
| 1  | extracellular matrix organization (GO:0030198)                                    | 2,27E-07 | 53,264         | 23/229  | CSGALNACT1;COL18A1;COL14A1;LUM;MMP2;LAMA4;BGN;TNC;HTRA1;LAMB1;NID1;CTSS;DCN;MMP11;ADAMTS5;MMP16;CTSK;ITGA10;COL6A2;ITGA11;MFAP2;TIMP2;COL6A3                                                                                                                               |
| 2  | regulation of epithelial cell proliferation (GO:0050678)                          | 6,43E-06 | 63,309         | 11/72   | OSR2;FGF7;SFRP1;CDKN2B;NR4A3;DAB2IP;LAMB1;SOX9;MTSS1;ZFP36L1;VEGFA                                                                                                                                                                                                         |
| 3  | positive regulation of cell differentiation (GO:0045597)                          | 1,40E-05 | 35,953         | 18/194  | WWTR1;IFITM1;CEBPB;JUND;PKDCC;HGF;AXIN2;MEDAG;ZFP36L1;SFRP1;BOC;TMEM119;SOX9;CD36;JUNB;ZNF385A;CDON;CMKLR1                                                                                                                                                                 |
| 4  | positive regulation of transcription from RNA polymerase II promoter (GO:0045944) | 1,52E-05 | 21,307         | 47/848  | CEBPB;INSIG1;GLIS3;FOXO4;LDB2;MEOX2;GLI3;DBP;IFI16;PRDM16;NAMPT;SOX9;JUNB;KDM6B;WVOX;EGR1;WWTR1;IL33;OSR2;SREBF1;CDKN2B;JUND;HGF;DAB2IP;NR1H3;ESR1;PBX1;SREBF2;DCN;NFATC4;RUNX1;RGMA;VEGFA;KAT2B;PLSCR1;ZEB2;NR4A3;IRF4;HAND2;DDIT3;CREBRF;IRF7;F2RL1;MAML3;LPIN1;OGT;ATF4 |
| 5  | regulation of cholesterol biosynthetic process (GO:0045540)                       | 1,56E-05 | 76,747         | 8/40    | SREBF1;SCD;FASN;MVD;APOE;ACACB;LSS;SREBF2                                                                                                                                                                                                                                  |
| 6  | regulation of cell migration (GO:0030334)                                         | 1,73E-05 | 28,870         | 24/316  | PDGFRB;PDGFRA;IFITM1;ACE;MCTP1;HGF;STC1;SEMA3E;LAMB1;ADARB1;LDB2;PODN;SOD2;VEGFA;AMOT;IGSF10;SFRP1;FRMD5;CXCL12;GPNMB;ENPP2;F2RL1;ROR2;SGK1                                                                                                                                |
| 7  | cellular response to hormone stimulus (GO:0032870)                                | 1,81E-05 | 52,044         | 11/80   | ABCC2;JUND;NR4A3;AKR1C1;KLF9;AKR1C3;AKR1C2;SLIT3;JUNB;CTSS;ZFP36L1                                                                                                                                                                                                         |
| 8  | regulation of cholesterol metabolic process (GO:0090181)                          | 1,89E-05 | 73,578         | 8/41    | SREBF1;SCD;FASN;MVD;APOE;ACACB;LSS;SREBF2                                                                                                                                                                                                                                  |
| 9  | regulation of angiogenesis (GO:0045765)                                           | 5,69E-05 | 30,628         | 16/177  | NPR1;SERPINF1;VEGFB;DAB2IP;SEMA3E;VASH1;FOXO4;THBS2;DCN;AMOT;RUNX1;VEGFA;SFRP1;GPNMB;ADGRA2;CHI3L1                                                                                                                                                                         |
| 10 | extracellular matrix disassembly (GO:0022617)                                     | 7,98E-05 | 41,935         | 10/78   | ADAMTS5;MMP11;MMP16;CTSK;MMP2;TIMP2;HTRA1;NID1;CTSS;DCN                                                                                                                                                                                                                    |

## Downregulated

|    | Term                                                           | P-value  | Combined Score | Overlap | Genes                                                                                                                                                                                                         |
|----|----------------------------------------------------------------|----------|----------------|---------|---------------------------------------------------------------------------------------------------------------------------------------------------------------------------------------------------------------|
| 1  | extracellular matrix organization (GO:0030198)                 | 6,41E-08 | 52,809         | 28/229  | DDR1;SPARC;ELN;SERPINE1;ICAM2;LOXL3;PDGFA;LAMC2;FGF2;THBS1;HAPLN1;LOXL2;SCUBE3;HAS3;MMP1;ITGA3;ITGA2;MMP3;ADAM19;COL4A2;LOX;MMP15;COL4A1;COL5A3;COL8A1;ITGA6;TGFB1;ITGA5                                      |
| 2  | regulation of cell migration (GO:0030334)                      | 2,00E-07 | 42,005         | 33/316  | LRRC15;CLIC4;SEMA7A;NOTCH1;CITED2;SERPINE1;SEMA3B;PDGFA;PIK3CD;PTPRJ;PRKX;LAMC2;SEMA3F;FGF1;THBS1;MYPN;PODXL;WNT5B;HSPA5;TPM1;ACTN4;RHOC;GTPBP4;RHOB;TIAM1;SNAI1;MYADM;PLXNB3;PLXNB2;AMOTL2;ITGA6;SINHCAF;ENG |
| 3  | positive regulation of endothelial cell migration (GO:0010595) | 2,21E-06 | 63,070         | 13/70   | MAP2K3;FOXC2;SPARC;WNT5A;FGF1;FGF2;THBS1;HIF1A;RHOB;ATOH8;TEK;CALR;MET                                                                                                                                        |
| 4  | negative regulation of cell migration (GO:0030336)             | 1,57E-05 | 38,152         | 16/121  | NDRG4;CLIC4;CITED2;SERPINE1;TPM1;PTPRJ;FGF2;GTPBP4;RHOB;PBLD;PLXNB3;CALR;SINHCAF;TRIB1;PFN2;ENG                                                                                                               |
| 5  | regulation of endothelial cell chemotaxis (GO:2001026)         | 8,15E-05 | 94,423         | 5/13    | NOTCH1;FGF1;THBS1;FGF2;MET                                                                                                                                                                                    |
| 6  | positive regulation of epithelial cell migration (GO:0010634)  | 1,13E-04 | 35,217         | 11/74   | DOCK5;FOXC2;SPARC;WNT5A;ATOH8;TEK;CALR;FGF1;THBS1;HIF1A;RHOB                                                                                                                                                  |
| 7  | positive regulation of cell migration (GO:0030335)             | 3,48E-04 | 18,790         | 20/221  | LRRC15;DOCK5;SEMA7A;NOTCH1;WNT5B;HSPA5;SEMA3B;PDGFA;PIK3CD;LAMC2;ACTN4;SEMA3F;FGF1;HIF1A;THBS1;TIAM1;PODXL;SNAI1;MYADM;ITGA6                                                                                  |
| 8  | positive regulation of protein kinase B signaling (GO:0051897) | 3,72E-04 | 22,698         | 14/127  | PDGFA;PIK3CD;PTPRJ;TXN;FGF1;FGF2;THBS1;FGF5;KITLG;ERBB3;KIT;TEK;MET;ENG                                                                                                                                       |
| 9  | positive regulation of angiogenesis (GO:0045766)               | 5,81E-04 | 22,637         | 12/103  | FOXC2;SERPINE1;WNT5A;ITGA5;ANGPTL4;TEK;FGF1;FGF2;HIF1A;THBS1;PGF;RHOB                                                                                                                                         |
| 10 | positive regulation of vasculature development (GO:1904018)    | 6,34E-04 | 22,155         | 12/104  | SERPINE1;WNT5A;KIT;ANGPTL4;TEK;FGF1;FGF2;HIF1A;THBS1;PGF;RHOB;ENG                                                                                                                                             |
