# Supplementary material for: Cell Sheets from Adipose Tissue MSC Induce Healing of Pressure Ulcer and Prevent Fibrosis via Trigger Effects on Granulation Tissue Growth and Vascularization
Source: MDPI journal article supplement (doi:10.3390/ijms21155567), 2020-08-04
Supplement: s1 [file s1]

# Supplementary Table A2

RNA Sequencing/Molecular Function

## Upregulated

|    | Term                                                                | P-value  | Combined Score | Overlap | Genes                                                                                                                             |
|----|---------------------------------------------------------------------|----------|----------------|---------|-----------------------------------------------------------------------------------------------------------------------------------|
| 1  | collagen binding<br>(GO:0005518)                                    | 2,16E-07 | 112,523        | 11/52   | MRC2;ECM2;COL14A1;LUM;CTSK;ITGA10;ITGA11;PCOLCE;NID1;PODN;CTSS                                                                    |
| 2  | transcription regulatory<br>region sequence-specific                | 4,33E-05 | 26,237         | 22/292  | EGR1;SREBF1;ZNF395;CEBPB;NR1H3;AEBP1;ESR1;PBX1;GLI3;RUNX1;PER3;NR4A3;DBP;<br>NFIL3;DDIT3;TRPS1;HAND2;MXI1;CREBRF;SOX9;ZNF589;ATF4 |
| 3  | RNA polymerase II<br>regulatory region DNA<br>binding (GO:0001012)  | 7,77E-05 | 27,742         | 17/201  | EGR1;SREBF1;CEBPB;NR1H3;AEBP1;PBX1;GLI3;RUNX1;NR4A3;DBP;NFIL3;TRPS1;<br>HAND2;MXI1;CREBRF;ZNF589;ATF4                             |
| 4  | scavenger receptor activity<br>(GO:0005044)                         | 2,72E-04 | 67,743         | 5/21    | COLEC12;LRP1;ACKR3;SSC5D;CD36                                                                                                     |
| 5  | integrin binding<br>(GO:0005178)                                    | 3,80E-04 | 29,041         | 10/94   | ADAMTS5;FRMD5;ECM2;CXCL12;GPNMB;FAP;LTBP4;EMILIN1;S1PR3;CD177                                                                     |
| 6  | platelet-derived growth<br>factor receptor binding<br>(GO:0005161)  | 3,98E-04 | 83,491         | 4/13    | PDGFRB;PDGFRA;IL1R1;VEGFA                                                                                                         |
| 7  | serine-type endopeptidase<br>activity (GO:0004252)                  | 5,88E-04 | 19,735         | 15/196  | CFD;C1S;C1R;MMP2;HTRA1;CTSS;C4B;C3;DPP4;C4A;MMP11;FAP;CTSK;CTSD;CFB                                                               |
| 8  | protein binding involved in<br>cell-matrix adhesion<br>(GO:0098634) | 7,67E-04 | 106,564        | 3/7     | ITGA10;ITGA11;EMILIN1                                                                                                             |
| 9  | metalloendopeptidase<br>activity (GO:0004222)                       | 2,63E-03 | 22,181         | 7/65    | ADAMTS5;MMP11;MME;MMP16;FAP;MMP2;ADAM33                                                                                           |
| 10 | mitogen-activated protein<br>kinase kinase binding<br>(GO:0031434)  | 1,10E-02 | 14,427         | 6/65    | PDGFRB;PDGFRA;EPHA4;ACE;DAB2IP;ROR2                                                                                               |

## Downregulated

|    | Term                                                                 | P-value  | Combined Score | Overlap | Genes                                                                                                                                     |
|----|----------------------------------------------------------------------|----------|----------------|---------|-------------------------------------------------------------------------------------------------------------------------------------------|
| 1  | protein-lysine 6-oxidase activity (GO:0004720)                       | 1,03E-03 | 89,675         | 3/6     | LOX;LOXL3;LOXL2                                                                                                                           |
| 2  | phosphatidylinositol-4,5-bisphosphate 3-kinase activity (GO:0046934) | 1,11E-03 | 23,471         | 9/68    | FGF5;KITLG;ERBB3;KIT;PIK3CD;PDGFA;FGF1;FGF2;MET                                                                                           |
| 3  | growth factor activity (GO:0008083)                                  | 1,24E-03 | 22,771         | 9/69    | EPGN;LIF;PDGFA;INHBA;FGF1;NGF;FGF2;DKK1;PGF                                                                                               |
| 4  | phosphatidylinositol bisphosphate kinase activity (GO:0052813)       | 1,52E-03 | 21,451         | 9/71    | FGF5;KITLG;ERBB3;KIT;PIK3CD;PDGFA;FGF1;FGF2;MET                                                                                           |
| 5  | transmembrane receptor protein tyrosine kinase activity (GO:0004714) | 2,20E-03 | 20,923         | 8/61    | DDR1;ERBB3;AXL;KIT;CRIM1;TEK;MET;FGFRL1                                                                                                   |
| 6  | cadherin binding (GO:0045296)                                        | 2,31E-03 | 11,633         | 23/313  | PTPN1;ANXA2;HSPA5;TRPC4;ANK3;RANGAP1;EHD1;SLC9A3R2;CDH4;MYO1B;EHD4;GPRC5A;KRT18;DIAPH3;MPRIIP;CDH2;FLNB;ITGA6;PKP3;EZR;MB21D2;DBN1;CDK5R1 |
| 7  | activin binding (GO:0048185)                                         | 5,51E-03 | 40,690         | 3/10    | FST;FSTL3;ENG                                                                                                                             |
| 8  | transforming growth factor beta receptor binding (GO:0005160)        | 6,36E-03 | 17,987         | 6/44    | BAMBI;INHBA;GDF6;SMAD6;BMP6;ENG                                                                                                           |
| 9  | fibroblast growth factor receptor binding (GO:0005104)               | 9,54E-03 | 30,331         | 3/12    | FGF5;FGF1;FGF2                                                                                                                            |
| 10 | growth factor receptor binding (GO:0070851)                          | 2,49E-02 | 8,374          | 8/92    | FGF5;EPGN;PDGFA;PTPRJ;ITGA5;FGF1;FGF2;PGF                                                                                                 |
